RETRACTION

## Retraction: Evolutionary game analysis of low-carbon technology innovation diffusion under PPP mode in China

The *PLOS One* Editors

The *PLOS One* Editors retract this article [1] because it was identified as one of a series of submissions for which we have concerns about potential manipulation of the publication process and peer review integrity. These concerns call into question the validity and provenance of the reported results. We regret that the issues were not identified prior to the article's publication.

All authors either did not respond directly or could not be reached.

### Reference

1. Jia C, Zhang R, Wang D. RETRACTED: Evolutionary game analysis of low-carbon technology innovation diffusion under PPP mode in China. *PLoS One*. 2022;17(12):e0279493. <https://doi.org/10.1371/journal.pone.0279493> PMID: [36574396](https://pubmed.ncbi.nlm.nih.gov/36574396/)

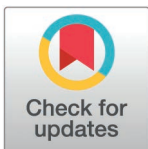

### OPEN ACCESS

**Citation:** The *PLOS One* Editors (2026) Retraction: Evolutionary game analysis of low-carbon technology innovation diffusion under PPP mode in China. *PLoS One* 21(5): e0349727. <https://doi.org/10.1371/journal.pone.0349727>

**Published:** May 28, 2026

**Copyright:** © 2026 The *PLOS One* Editors. This is an open access article distributed under the terms of the [Creative Commons Attribution License](https://creativecommons.org/licenses/by/4.0/), which permits unrestricted use, distribution, and reproduction in any medium, provided the original author and source are credited.
